# Supplementary material for: Nutritional survey in critically ill children: a single center study in China
Source: PubMed Central journal article supplement — Transl Pediatr. 2020 Jun;9(3):221–30. doi: 10.21037/tp-19-173 (PMC7347761; doi:10.21037/tp-19-173), 2020-06
Supplement: tp-09-03-221-dss.pdf [file tp-09-03-221-dss.pdf]

## Data Sharing Statement

|                     |                                                                                                                                                    |                                                                                                                                    |
|---------------------|----------------------------------------------------------------------------------------------------------------------------------------------------|------------------------------------------------------------------------------------------------------------------------------------|
| <b>Article Info</b> | Available at <a href="http://dx.doi.org/10.21037/tp-19-173">http://dx.doi.org/10.21037/tp-19-173</a>                                               |                                                                                                                                    |
| <b>Item</b>         | <b>Question</b>                                                                                                                                    | <b>Authors' Response<br/>(place "-" if not applicable)</b>                                                                         |
| 1                   | Would you like to share data collected for your study to others?                                                                                   | Yes                                                                                                                                |
| 2                   | If not, would you like to share the reason for your decision?                                                                                      | -                                                                                                                                  |
| 3                   | What data in particular will be shared?                                                                                                            | All the data will be shared.                                                                                                       |
| 4                   | Any other documents will be share? Such as study protocol, statistical analysis plan, informed consent form, clinical study report, analytic code. | Statistical analysis plan, informed consent form, and clinical study report will also be shared if requested.                      |
| 5                   | When will data availability begin?                                                                                                                 | From the publication date.                                                                                                         |
| 6                   | When will data availability end?                                                                                                                   | Two years within the publication date, since the technique may be updated over time.                                               |
| 7                   | To whom will you share the data?                                                                                                                   | Physician in PICU and nutritional department.                                                                                      |
| 8                   | For what type of analysis or purpose?                                                                                                              | Study in nutrition in critical pediatric patients.                                                                                 |
| 9                   | How or where can the data/documents be obtained?                                                                                                   | Emails could be sent to the address below to obtain the shared data:<br><a href="mailto:ningbotao@126.com">ningbotao@126.com</a> . |
| 10                  | Any other restrictions?                                                                                                                            | We may balance the potential benefits and risks for each request and then provide the data that could be shared.                   |
